# Supplementary material for: Low-temperature curable TiO2 sol for separator and HTM-free carbon-based perovskite solar cells
Source: Royal Society of Chemistry journal article supplement (doi:10.1039/d3ma00427a), 2023-09-26

## Supporting information

### **Low-temperature curable TiO<sub>2</sub> sol for Separator, HTM free Carbon-based perovskite solar cells**

Reshma Dileep<sup>1,2</sup>, Thulasi Raman<sup>1</sup>, Easwaramoorthi Ramasamy<sup>1</sup>, S. Mallick<sup>2</sup>, T. N. Rao<sup>1</sup>,  
Ganapathy Veerappan<sup>1\*</sup>

<sup>1</sup>Center for Solar Energy Materials, International Advanced Research Center for Powder Metallurgy and New Materials (ARCI), Balapur PO, Hyderabad – 500005, Telangana, India.

<sup>2</sup>Department of Metallurgical Engineering & Materials Science, Indian Institute of Technology, Bombay, Powai, Mumbai 400076, Maharashtra, India

\*Corresponding author: [ganagv@arci.res.in](mailto:ganagv@arci.res.in)

*Device fabrication:* Fluorine doped tin oxide (FTO) substrates were etched using Zinc metal dust and hydrochloric acid. The substrates were cut into 2 x 2cm and cleaned using various solvents such as soap solution, DI water, acetone and IPA, each 15min by ultrasonication. The substrates were blown dry using Nitrogen gas. 0.15M and 0.3M compact TiO<sub>2</sub> solution was spin coated at 4000rpm, 20s each. The substrates were sintered at 500°C for 30min. The ambient temperature curable TiO<sub>2</sub> sol was spin coated onto the compact TiO<sub>2</sub> layer at 1500rpm, 10s. Multiple layers were coated to attain the desired thickness. Perovskite precursor solution was prepared by adding 461mg PbI<sub>2</sub> and 159mg of MAI in 600mg of DMF and 79mg of DMSO. The solution was stirred at room temperature for 1h. The solution was filtered before spin coating. 70μL of precursor solution was spin coated on TiO<sub>2</sub> film at 4000rpm 25s, 400μL of Toluene was dropped at 15s during the spinning time. The films were subjected to two step annealing, 70°C for 1min followed by 100°C for 2min. The substrates were masked and carbon paste was doctor bladed. The films were subjected to annealing at 80°C for 30min. The devices were tested under AM 1.5 standard conditions.

*Characterization techniques:* Crystallographic studies were carried out using (Rigaku 9kW smartlab). Optical characteristics were analyzed using UV-Vis-NIR spectrophotometer (cary 5000 UV-Vis-IR Spectrophotometer) over the interval of 400-800nm. The surface morphology and cross section images were captured using (ZEISS GeminiSEM 500). Photoluminescence spectra of perovskite films were recorded using spectrofluorometer (450W ozone free Xe source, Horiba scientific, FL3C-21) from 650nm to 850nm with an excitation wavelength of 540nm. The devices were characterized under AM 1.5 standard conditions using a AAA solar simulator (oriel instruments) at ambient conditions.

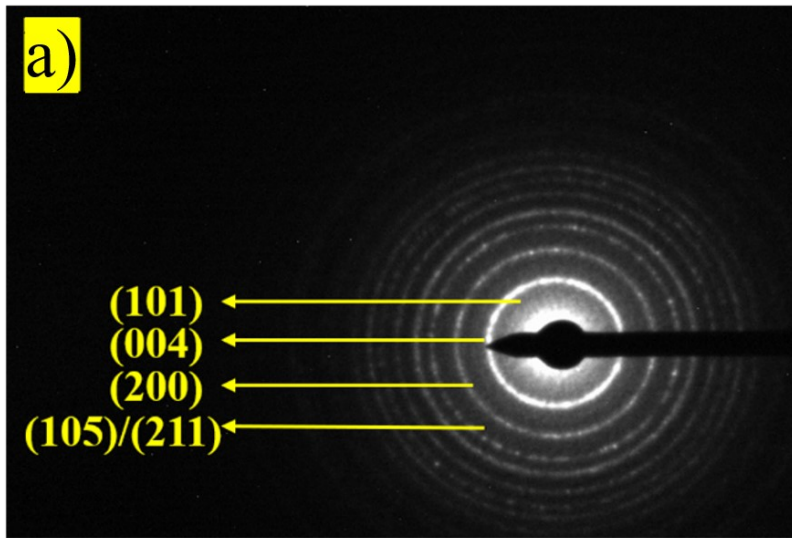

Figure S1. (a) SAED pattern of TiO<sub>2</sub>

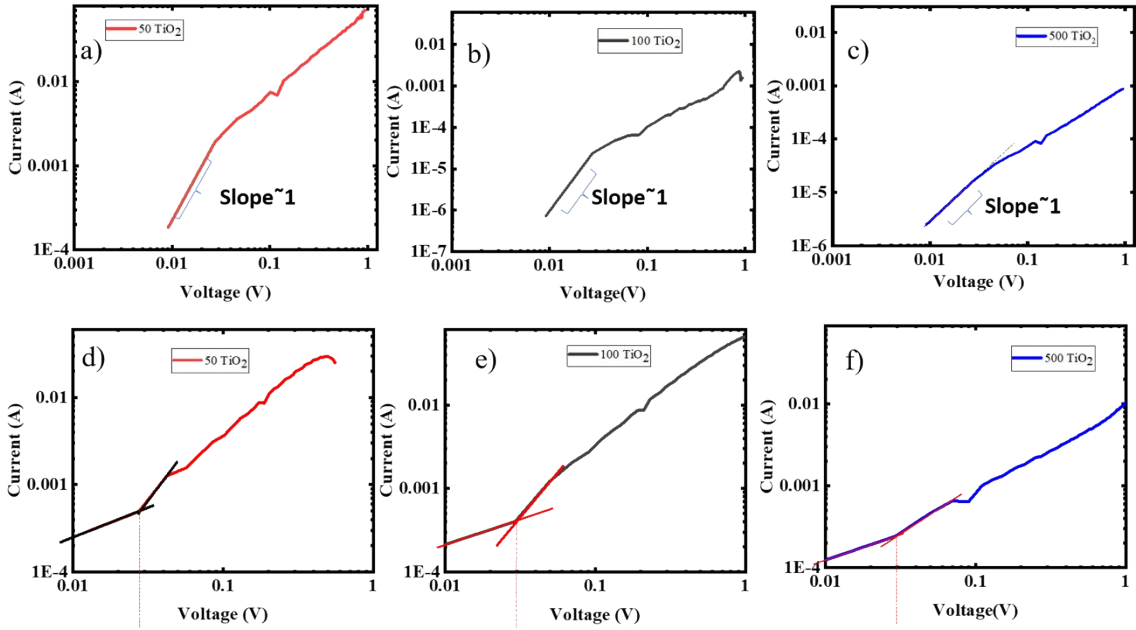

Figure.S2. Direct current conductivity measurement of (a) 50 TiO<sub>2</sub> (b) 100 TiO<sub>2</sub> and (c)500 TiO<sub>2</sub>. Trap state density measurement of (d) 50 TiO<sub>2</sub> (e) 100 TiO<sub>2</sub> and (f)500 TiO<sub>2</sub>.

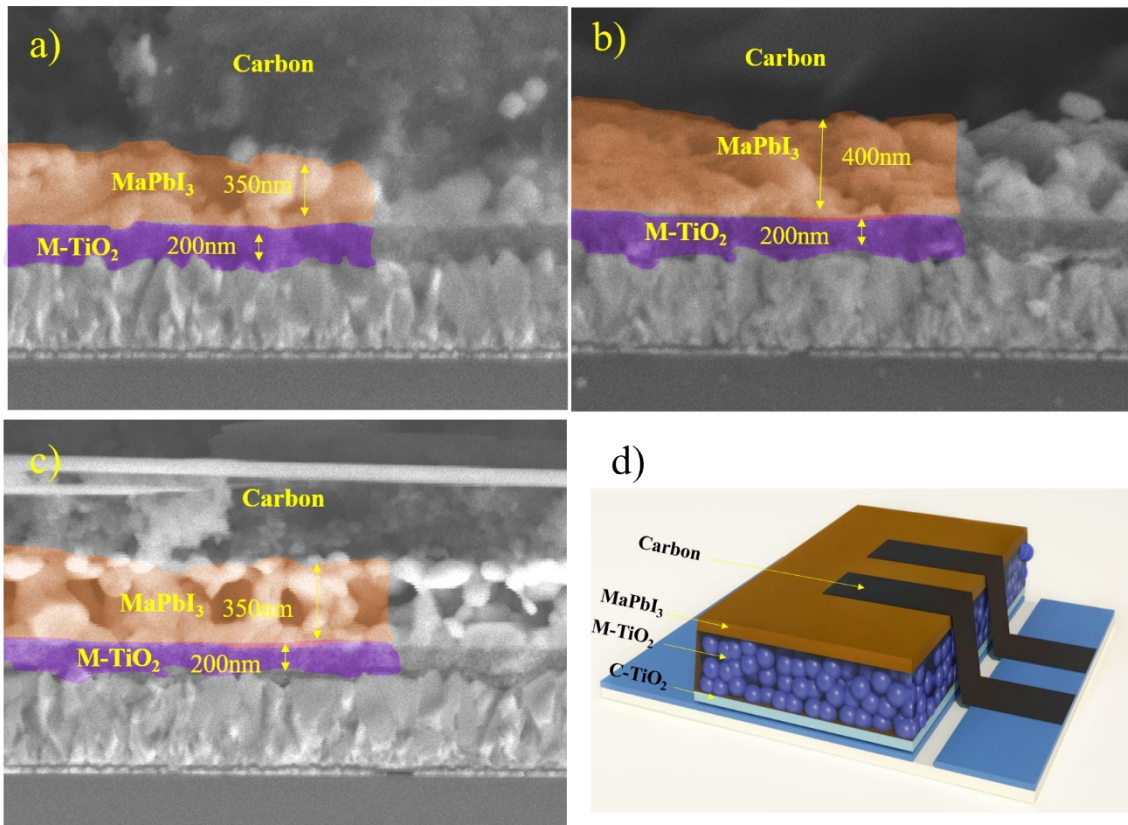

Figure.S3. CPSC device cross-sectional images with (a-c) 50TiO<sub>2</sub>, 100TiO<sub>2</sub> and 500TiO<sub>2</sub> as ETL. (d) schematic illustration of CPSCs

Figure S3 shows the cross section of the devices, the TiO<sub>2</sub> thickness were measured to be 200nm thick, MaPbI<sub>3</sub> thickness varying between 350-400nm and 20μm thick carbon layer. The cross-section images clearly indicate the pores present in the perovskite layer in 500 TiO<sub>2</sub>, which can contribute to the high resistance in the cell when compared to the other devices.

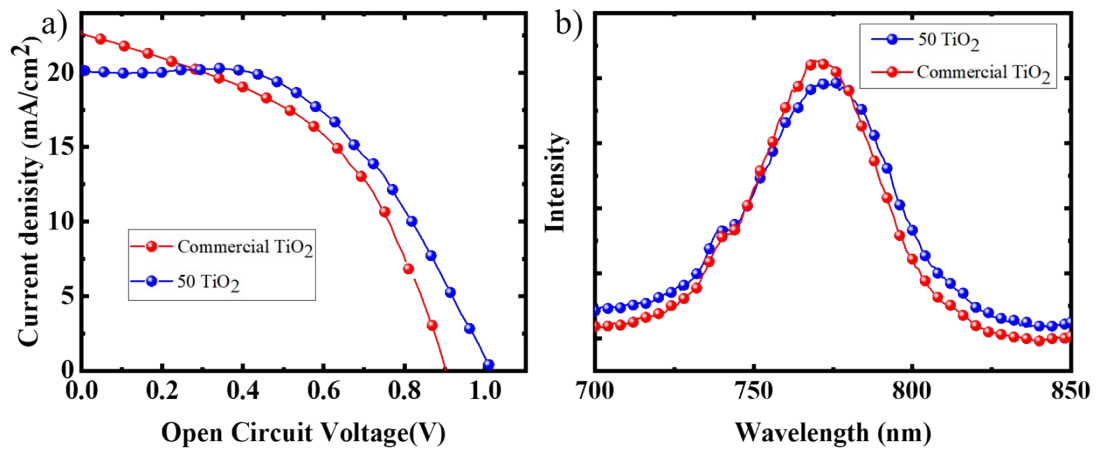

Figure.S4. (a)IV characteristics of CPSCs with Commercial TiO<sub>2</sub> and 50 TiO<sub>2</sub> and (b)PL spectra

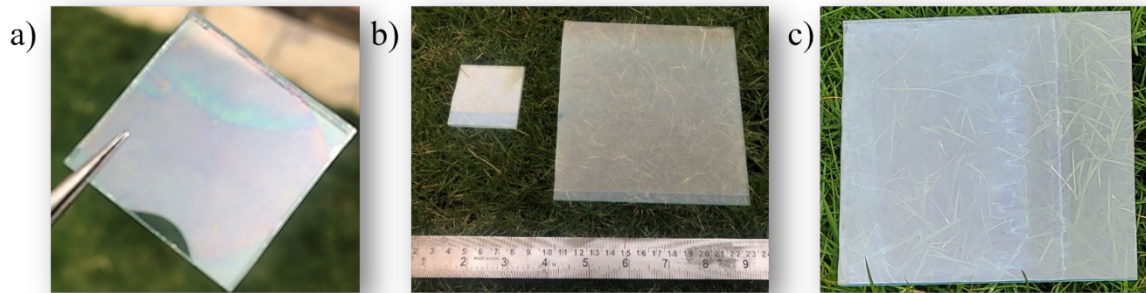

Figure.S5. TiO<sub>2</sub> films deposited by (a) spin coating (b) spray coating and (c) dip coating

| Device id                   | V <sub>OC</sub> (V) | J <sub>SC</sub> (mA/cm <sup>2</sup> ) | F.F(%) | η (%) |
|-----------------------------|---------------------|---------------------------------------|--------|-------|
| 50 TiO <sub>2</sub>         | 1.01                | 20.1                                  | 50.7   | 10.8  |
| Commercial TiO <sub>2</sub> | 0.90                | 22.5                                  | 46.7   | 9.9   |

Table.S1. Solar cell parameters of CPSCs with 50 TiO<sub>2</sub> and commercial TiO<sub>2</sub>.

## Comparison of low and high temperature processable CPSC device fabrication

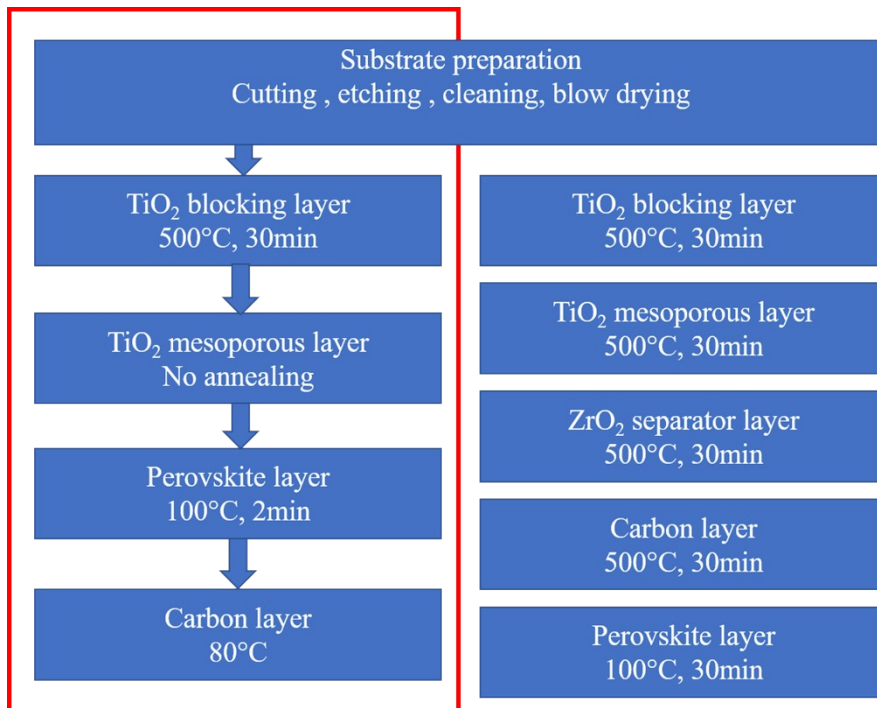

Supplement: d3ma00427a1.pdf [file d3ma00427a1.pdf]
